# Supplementary material for: Busulfan pharmacokinetics in adults – a real-world evaluation of intra-individual variabil-ity and the impact of obesity and deferasirox
Source: Research Square preprint supplement (doi:10.21203/rs.3.rs-7660052/v1), 2025-10-06
Supplement: Supplementary file 1 [file 3e85b439a487d7553193d0ff.xlsx]

## Sheet: Tabelle1
	Median	Range
Age [years]	59.6	19.41 - 77.69
Total body weight [kg]	78.0	46.5 - 176.0
ideal body weight [kg]	68.7	37.7 - 98.2
adjusted ideal body weight [kg]	71.6	44.4 - 117.7
Height [cm]	175	144 - 205
BMI [kg/m²]	25.29	15.56 - 54.07
	n	%
male sex	161	56.1
BMI > 25 kg/m²	130	45.3
Deferasirox	99	34.5
Underlying disease
AML	150	52.3
MF	76	26.5
MDS	38	13.2
Multiple Myeloma	9	3.1
Other	14	4.9
Donor type
MRD	43	15.0
MUD	188	65.5
MMUD	32	11.1
Haplo	24	8.4
Stem cell source: PB	284	99.0
